# Supplementary material for: Antibiotic Susceptibility Profiling of Human Pathogenic Staphylococcus aureus Strains Using Whole Genome Sequencing and Genome-Scale Annotation Approaches
Source: MDPI journal article supplement (doi:10.3390/microorganisms11051124), 2023-04-26
Supplement: s1 [file s1]

# Antibiotic susceptibility profiling of human pathogenic *Staphylococcus aureus* strains using whole genome sequencing and genome-scale annotation approaches

Mejdi Snoussi<sup>1,2\*</sup>, Emira Noumi<sup>1,2</sup>, Nouha Bouali<sup>1,2</sup>, Abdulrahman S. Bazaid<sup>3</sup>, Mousa Alrashidi<sup>1,4</sup>, Hisham N. Altayb<sup>5,6</sup>, Kamel Chaieb<sup>5,7</sup>

<sup>1</sup> Department of Biology, College of Science, University of Hail, P.O. Box 2440, Ha'il 2440, Saudi Arabia; [m.snoussi@uoh.edu.sa](mailto:m.snoussi@uoh.edu.sa) (M.S.); [n.bouali@uoh.edu.sa](mailto:n.bouali@uoh.edu.sa) (N.B.); [eb.noumi@uoh.edu.sa](mailto:eb.noumi@uoh.edu.sa) (E.N.).

<sup>2</sup> Medical and Diagnostic Research Centre, University of Ha'il, Hail 55473, Saudi Arabia

<sup>3</sup> Department of Medical Laboratory Science, College of Applied Medical Sciences, University of Hail, Hail 55476, Saudi Arabia, [ar.bazaid@uoh.edu.sa](mailto:ar.bazaid@uoh.edu.sa) (A.S.B.)

<sup>4</sup> Molecular Diagnostics and Personalized Therapeutics Unit, University of Hail, Hail P.O. Box 2440, Saudi Arabia, [mo.alreshidi@uoh.edu.sa](mailto:mo.alreshidi@uoh.edu.sa) (M.R.)

<sup>5</sup> Department of Biochemistry, Faculty of Science, King Abdulaziz University, Jeddah, Saudi Arabia; [hdemmahom@kau.edu.sa](mailto:hdemmahom@kau.edu.sa) (H.N.A.)

<sup>6</sup> Center of Artificial Intelligence in Precision Medicines, King Abdulaziz University, Saudi Arabia; [kalshaib@kau.edu.sa](mailto:kalshaib@kau.edu.sa) (K.C.)

<sup>8</sup> Laboratory of Analysis, Treatment and Valorization of Pollutants of the Environmental and Products, Faculty of Pharmacy, University of Monastir, Tunisia.

\*Correspondence : Pr. Mejdi Snoussi ([m.snoussi@uoh.edu.sa](mailto:m.snoussi@uoh.edu.sa))

**Supplementary Table S1.** Details of virulence factors identified in the analyzed *S. aureus*.

| Virulence mechanism      | Related genes | MRSA     | S1       | S8       | S9       | S14      | S20      | S21      | S22      | S23      |
|--------------------------|---------------|----------|----------|----------|----------|----------|----------|----------|----------|----------|
| Enzyme (15 Items)        |               |          |          |          |          |          |          |          |          |          |
| Cysteine protease        | sspB          | SAR1021  | orf00729 | orf02372 | orf02220 | orf01632 | orf00379 | orf01616 | orf00548 | orf01529 |
| Cysteine protease        | sspC          | SAR1020  | orf00730 | orf02371 | orf02219 | orf01631 | orf00378 | orf01617 | orf00549 | orf01530 |
| Hyaluronate lyase        | hysA          | SAR2292  | orf01573 | orf02167 | orf01632 | orf01871 | orf02310 | orf00037 | orf01270 | orf01830 |
| Lipase                   | geh           | SAR0317  | orf01915 | orf00137 | orf02309 | orf00108 | orf01968 | orf01853 | orf01920 | orf00582 |
| Lipase                   | lip           | SAR2753  | orf01366 | orf00832 | orf00265 | orf01901 | orf01335 | orf01702 | orf02435 | orf01153 |
| Serine V8 protease       | sspA          | SAR1022  | orf00728 | orf02373 | orf00834 | orf01633 | orf00380 | orf01615 | orf00547 | orf01528 |
| Serine protease          | splA          | -        | orf02216 | orf02454 | orf02221 | -        | orf01120 | -        | orf00381 | orf02269 |
| Serine protease          | splB          | -        | orf02217 | orf02455 | orf01620 | orf02487 | orf01119 | -        | orf00380 | orf02268 |
| Serine protease          | splC          | SAR1906  | orf02218 | orf02456 | orf01621 | orf02488 | orf01118 | -        | orf00379 | orf02267 |
| Serine protease          | splD          | SAR1905  | orf02219 | orf02457 | orf01622 | -        | orf01117 | -        | -        | orf02266 |
| Serine protease          | splE          | SAR1902  | orf02220 | orf02551 | orf01623 | -        | -        | -        | orf00377 | orf02265 |
| Serine protease          | splF          | SAR1900* | orf02221 | orf02552 | orf01624 | orf02489 | orf01114 | -        | orf00376 | orf02264 |
| Staphylocoagulase        | coa           | SAR0222  | orf01274 | orf00228 | orf01625 | orf00198 | orf01555 | orf01287 | orf01535 | orf00487 |
| Staphylokinase           | sak           | SAR2039  | orf01814 | orf01688 | orf00175 | orf01021 | orf02073 | orf00943 | orf00733 | orf02079 |
| Thermonuclease           | nuc           | SAR0847  | orf00455 | orf00736 | orf01958 | orf00466 | orf00158 | orf00468 | orf00845 | orf00925 |
|                          |               |          | orf00886 | orf01239 | orf02427 | orf00640 | orf00650 | orf00579 | orf02225 | orf01683 |
| Immune evasion (5 Items) |               |          |          |          |          |          |          |          |          |          |
| AdsA                     | adsA          | SAR0023  | orf01100 | orf00765 | orf00768 | orf01673 | orf01399 | orf02264 | orf01972 | orf01217 |
| CHIPS                    | chp           | SAR2036  | -        | -        | -        | -        | -        | orf00941 | orf00735 | -        |
| Capsule                  | --            | SAR0151  | orf01201 | orf00291 | orf00097 | orf00254 | orf01477 | orf01215 | orf01462 | orf00415 |
|                          |               | SAR0152  | orf01202 | orf00292 | orf00098 | orf00255 | orf01478 | orf01216 | orf01463 | orf00416 |
|                          |               | SAR0153  | orf01203 | orf00293 | orf00099 | orf00256 | orf01479 | orf01217 | orf01464 | orf00417 |
|                          |               | SAR0154  | orf01205 | orf00294 | orf00100 | orf00257 | orf01480 | orf01218 | orf01465 | orf00418 |
|                          |               | SAR0155  | orf01206 | orf00296 | orf00101 | orf00258 | orf01481 | orf01219 | orf01466 | orf00419 |
|                          |               | SAR0156  | orf01207 | orf00297 | orf00102 | orf00259 | orf01482 | orf01220 | orf01467 | orf00420 |
|                          |               | SAR0157  | orf01209 | orf00298 | orf00103 | orf00260 | orf01483 | orf01221 | orf01468 | orf00421 |

|                                    |         |          |          |          |          |          |          |          |          |          |
|------------------------------------|---------|----------|----------|----------|----------|----------|----------|----------|----------|----------|
|                                    |         | SAR0158  | orf01210 | orf00299 | orf00104 | orf00261 | orf01484 | orf01222 | orf01469 | orf00422 |
|                                    |         | SAR0159  | orf01211 | orf00300 | orf00105 | orf00262 | orf01485 | orf01223 | orf01470 | orf00423 |
|                                    |         | SAR0160  | orf01212 | orf00301 | orf00106 | orf00263 | orf01486 | orf01224 | orf01471 | orf00424 |
| SCIN                               | scn     | -        | orf01816 | orf01686 | orf00107 | orf01019 | orf02075 | orf00940 | orf00736 | orf02077 |
| Sbi                                | sbi     | -        | orf02103 | orf01074 | orf00109 | orf01193 | orf01696 | orf00268 | orf01006 | orf01939 |
| <b>Secretion system (12 Items)</b> |         |          |          |          |          |          |          |          |          |          |
| Type VII secretion system          | esaA    | SAR0280  | orf01328 | orf00172 | orf00230 | orf00142 | orf01610 | orf01343 | orf01594 | orf00545 |
| Type VII secretion system          | esaB    | SAR0282  | orf01330 | orf00170 | orf00232 | -        | orf01612 | orf01345 | orf01596 | -        |
| Type VII secretion system          | esaD    | -        | orf01337 | orf00163 | orf00239 | orf00133 | orf01619 | -        | orf01603 | orf00554 |
| Type VII secretion system          | esaE    | -        | orf01335 | orf00165 | orf00237 | orf00135 | orf01617 | -        | orf01601 | orf00552 |
| Type VII secretion system          | esaG    | SAR0293  | orf01338 | orf00155 | orf00240 | orf00126 | orf01620 | orf01834 | orf01604 | orf00555 |
|                                    |         | SAR0294  | orf01341 | orf00156 | orf00244 | orf00127 | orf01623 | orf01835 | orf01607 | orf00558 |
|                                    |         | -        | orf01342 | orf00157 | orf00245 | orf00128 | orf01624 | -        | orf01610 | orf00559 |
|                                    |         | -        | orf01343 | orf00158 | orf00246 | orf00129 | orf01625 | -        | orf01611 | orf00560 |
| Type VII secretion system          | essA    | SAR0281  | orf01329 | orf00171 | orf00231 | orf00141 | orf01611 | orf01344 | orf01595 | orf00546 |
| Type VII secretion system          | essB    | SAR0283  | orf01331 | orf00169 | orf00233 | orf00139 | orf01613 | orf01346 | orf01597 | orf00548 |
| Type VII secretion system          | essC    | SAR0284  | orf01332 | orf00168 | orf00234 | orf00138 | orf01614 | orf01347 | orf01598 | orf00549 |
| Type VII secretion system          | esxA    | SAR0279  | orf01327 | orf00173 | orf00229 | orf00143 | orf01609 | orf01342 | orf01593 | orf00544 |
| Type VII secretion system          | esxB    | -        | orf01334 | orf00166 | orf00236 | orf00136 | orf01616 | -        | orf01600 | orf00551 |
| Type VII secretion system          | esxC    | -        | orf01333 | orf00167 | orf00235 | orf00137 | orf01615 | -        | orf01599 | orf00550 |
| Type VII secretion system          | esxD    | -        | orf01336 | orf00164 | orf00238 | orf00134 | orf01618 | -        | orf01602 | orf00553 |
| <b>Toxin (74 Items)</b>            |         |          |          |          |          |          |          |          |          |          |
| Alpha hemolysin                    | hly/hla | SAR1136* | orf00617 | orf01436 | orf01506 | orf02561 | orf00489 | orf01210 | orf00438 | orf00758 |
| Beta hemolysin                     | hlyB    | SAR2031* | orf01765 | orf01746 | orf02411 | orf01079 | orf02027 | orf00997 | orf02080 | orf02243 |
| Delta hemolysin                    | hlyD    | SAR2122  | orf01750 | orf01781 | orf02376 | -        | orf02012 | orf01030 | orf02067 | orf02230 |
| Enterotoxin A                      | sea     | SAR2043  | orf01811 | -        | -        | -        | orf02070 | -        | -        | orf02082 |
| Enterotoxin B                      | seb     | -        | orf00896 | -        | -        | orf00044 | -        | -        | -        | -        |

|                          |       |         |          |          |          |          |          |          |          |          |
|--------------------------|-------|---------|----------|----------|----------|----------|----------|----------|----------|----------|
| Enterotoxin C            | sec   | -       | -        | -        | -        | -        | -        | -        | -        | -        |
| Enterotoxin D            | sed   | -       | -        | -        | -        | -        | -        | -        | -        | -        |
| Enterotoxin E            | see   | -       | -        | -        | -        | -        | -        | -        | -        | -        |
| Enterotoxin G            | seg   | SAR1916 | -        | -        | -        | orf02473 | -        | orf02533 | -        | -        |
| Enterotoxin H            | seh   | -       | orf01128 | -        | -        | -        | orf01404 | -        | -        | -        |
| Enterotoxin I            | sei   | SAR1919 | -        | -        | -        | orf02522 | -        | orf02530 | -        | -        |
| Enterotoxin J            | sej   | -       | -        | -        | -        | -        | -        | -        | -        | -        |
| Enterotoxin Yent1        | yent1 | -       | -        | -        | -        | -        | -        | -        | -        | -        |
| Enterotoxin Yent2        | yent2 | -       | -        | -        | -        | -        | -        | -        | -        | -        |
| Enterotoxin-like K       | selk  | -       | orf01767 | -        | -        | -        | orf02029 | -        | -        | -        |
| Enterotoxin-like L       | sell  | -       | -        | -        | -        | -        | -        | -        | -        | -        |
| Enterotoxin-like M       | selm  | SAR1920 | -        | -        | -        | orf02521 | -        | orf02529 | -        | -        |
| Enterotoxin-like N       | seln  | SAR1917 | -        | -        | -        | orf02524 | -        | orf02532 | -        | -        |
| Enterotoxin-like O       | selo  | SAR1921 | -        | -        | -        | orf02520 | -        | orf02541 | -        | -        |
| Enterotoxin-like P       | selp  | -       | -        | -        | -        | -        | -        | -        | -        | -        |
| Enterotoxin-like Q       | selq  | -       | orf01768 | -        | -        | -        | orf02030 | -        | -        | -        |
| Enterotoxin-like R       | selr  | -       | -        | -        | -        | -        | -        | -        | -        | -        |
| Enterotoxin-like U       | selu  | -       | -        | -        | -        | orf02523 | -        | orf02531 | -        | -        |
| Exfoliative toxin type A | eta   | -       | -        | -        | -        | -        | -        | -        | -        | -        |
| Exfoliative toxin type B | etb   | -       | -        | -        | -        | -        | -        | -        | -        | -        |
| Exfoliative toxin type C | etc   | -       | -        | -        | -        | -        | -        | -        | -        | -        |
| Exfoliative toxin type D | etd   | -       | -        | -        | -        | -        | -        | -        | -        | -        |
| Exotoxin                 | set10 | -       | -        | -        | -        | -        | -        | orf02141 | -        | -        |
| Exotoxin                 | set11 | -       | -        | -        | -        | -        | -        | -        | -        | -        |
| Exotoxin                 | set12 | -       | -        | -        | -        | -        | -        | -        | -        | -        |
| Exotoxin                 | set13 | -       | -        | -        | -        | -        | -        | orf02139 | -        | orf00674 |
| Exotoxin                 | set14 | -       | -        | -        | -        | -        | -        | -        | -        | -        |
| Exotoxin                 | set15 | -       | -        | -        | -        | orf01972 | -        | orf02135 | -        | orf02405 |
| Exotoxin                 | set16 | -       | orf01997 | orf00059 | orf00344 | -        | orf01862 | orf02145 | orf01845 | orf00665 |
| Exotoxin                 | set17 | -       | orf01998 | -        | -        | -        | orf01861 | -        | -        | -        |

|                 |       |         |          |          |          |          |          |          |          |          |
|-----------------|-------|---------|----------|----------|----------|----------|----------|----------|----------|----------|
| Exotoxin        | set18 | -       | orf01999 | orf00057 | orf00346 | orf00008 | orf01860 | -        | -        | orf00667 |
| Exotoxin        | set19 | -       | orf02001 | orf00055 | orf00347 | orf00007 | orf01858 | -        | -        | -        |
| Exotoxin        | set1  | SAR0428 | -        | -        | -        | -        | -        | orf02140 | orf01839 | -        |
| Exotoxin        | set20 | -       | -        | -        | -        | -        | -        | -        | -        | -        |
| Exotoxin        | set21 | -       | orf02003 | -        | -        | orf00005 | orf01856 | -        | -        | -        |
| Exotoxin        | set22 | -       | orf02004 | orf00053 | orf00349 | orf00004 | orf01855 | -        | -        | orf00672 |
| Exotoxin        | set23 | -       | orf02005 | -        | -        | -        | orf01854 | -        | -        | -        |
| Exotoxin        | set24 | -       | orf02006 | -        | -        | -        | -        | -        | -        | -        |
| Exotoxin        | set25 | -       | orf02007 | orf00050 | orf00352 | orf00001 | orf01853 | -        | -        | orf00675 |
| Exotoxin        | set26 | -       | orf02010 | orf00047 | orf00355 | -        | orf01850 | -        | orf01834 | -        |
| Exotoxin        | set2  | SAR0425 | -        | -        | -        | -        | -        | orf02143 | orf01842 | -        |
| Exotoxin        | set30 | -       | -        | -        | -        | orf00010 | -        | -        | -        | -        |
| Exotoxin        | set31 | -       | -        | -        | -        | orf00009 | -        | -        | -        | -        |
| Exotoxin        | set32 | -       | -        | -        | -        | -        | -        | -        | -        | -        |
| Exotoxin        | set33 | -       | -        | -        | -        | -        | -        | -        | -        | -        |
| Exotoxin        | set34 | -       | orf02002 | orf00054 | orf00348 | orf00006 | orf01857 | -        | -        | orf00671 |
| Exotoxin        | set35 | -       | -        | -        | -        | -        | -        | -        | -        | -        |
| Exotoxin        | set36 | -       | -        | -        | -        | -        | -        | -        | -        | -        |
| Exotoxin        | set37 | -       | -        | orf00052 | orf00350 | orf00003 | -        | -        | -        | orf00673 |
| Exotoxin        | set38 | -       | -        | orf00051 | orf00351 | orf00002 | -        | -        | -        | -        |
| Exotoxin        | set39 | -       | -        | -        | -        | -        | -        | -        | -        | -        |
| Exotoxin        | set3  | SAR0427 | -        | -        | -        | -        | -        | -        | orf01840 | -        |
| Exotoxin        | set40 | -       | -        | -        | -        | -        | -        | -        | -        | -        |
| Exotoxin        | set4  | SAR0431 | -        | -        | -        | -        | -        | orf02138 | orf01837 | -        |
| Exotoxin        | set5  | SAR0429 | -        | -        | -        | -        | -        | -        | orf01838 | -        |
| Exotoxin        | set6  | -       | -        | -        | -        | -        | -        | -        | -        | -        |
| Exotoxin        | set7  | -       | -        | orf00058 | orf00345 | -        | -        | orf02144 | orf01844 | orf00666 |
| Exotoxin        | set8  | -       | -        | -        | -        | -        | -        | -        | -        | -        |
| Exotoxin        | set9  | -       | -        | -        | -        | -        | -        | -        | -        | -        |
| Gamma hemolysin | hlgA  | SAR2509 | orf02104 | orf01073 | orf01074 | orf01194 | orf01131 | orf00270 | orf00388 | orf01938 |

|                             |           |         |          |          |          |          |          |          |          |          |
|-----------------------------|-----------|---------|----------|----------|----------|----------|----------|----------|----------|----------|
|                             |           |         | orf02204 | orf02448 | orf01613 | orf02479 | orf01695 | -        | orf01007 | orf02280 |
| Gamma hemolysin             | hlgB      | SAR2511 | orf02106 | orf01071 | orf01072 | orf01196 | orf01693 | orf00272 | orf01009 | orf01936 |
| Gamma hemolysin             | hlgC      | SAR2510 | orf02105 | orf01072 | orf01073 | orf01195 | orf01694 | orf00271 | orf01008 | orf01937 |
| Leukocidin M                | lukF-like | -       | -        | -        | -        | -        | -        | -        | -        | -        |
| Leukocidin M                | lukM      | -       | -        | -        | -        | -        | -        | -        | -        | -        |
| Leukotoxin D                | lukD      | SAS1748 | orf02205 | orf02449 | orf01614 | orf02480 | orf01130 | -        | orf00387 | orf02279 |
| Leukotoxin E                | lukE      | SAS1749 | -        | -        | -        | -        | -        | -        | -        | -        |
| Panton-Valentine leukocidin | lukF-PV   | -       | -        | -        | -        | orf02119 | -        | -        | -        | -        |
| Panton-Valentine leukocidin | lukS-PV   | -       | -        | -        | -        | orf02120 | -        | -        | -        | -        |
| Toxic shock syndrome toxin  | tsst      | -       | -        | -        | -        | -        | -        | orf01006 | -        | -        |

**Supplementary Table S2.** Predicted virulence factors in the whole genome of the studied *S. aureus*.

| Virulence mechanism              | Related genes | MRSA252 | S1 | S8 | S9 | S14 | S20 | S21 | S22 | S23 |
|----------------------------------|---------------|---------|----|----|----|-----|-----|-----|-----|-----|
| <b>Enzyme (8 Items)</b>          |               |         |    |    |    |     |     |     |     |     |
| Staphylocoagulase                | 1             | +       | +  | +  | +  | +   | +   | +   | +   | +   |
| Serine protease                  | 6             | 3 / 1   | +  | +  | +  | 3   | 5   | -   | 5   | +   |
| Cysteine protease                | 2             | +       | +  | +  | +  | +   | +   | +   | +   | +   |
| Thermonuclease                   | 1             | +       | +  | +  | +  | +   | +   | +   | +   | +   |
| Hyaluronate lyase                | 1             | +       | +  | +  | +  | +   | +   | +   | +   | +   |
| Lipase                           | 2             | +       | +  | +  | +  | +   | +   | +   | +   | +   |
| Serine V8 protease               | 1             | +       | +  | +  | +  | +   | +   | +   | +   | +   |
| Staphylokinase                   | 1             | +       | +  | +  | +  | +   | +   | +   | +   | +   |
| <b>Immune evasion (5 Items)</b>  |               |         |    |    |    |     |     |     |     |     |
| SCIN                             | 1             | +       | +  | +  | +  | +   | +   | +   | +   | +   |
| Sbi                              | 1             | +       | +  | +  | +  | +   | +   | +   | +   | +   |
| CHIPS                            | 1             | +       | -  | -  | -  | -   | -   | +   | +   | -   |
| AdsA                             | 1             | +       | +  | +  | +  | +   | +   | +   | +   | +   |
| Capsule                          | 1             | +       | +  | +  | +  | +   | +   | +   | +   | +   |
| <b>Secretion system (1 Item)</b> |               |         |    |    |    |     |     |     |     |     |
| Type VII secretion system        | 12            | 7       | +  | +  | +  | 11  | +   | 7   | +   | 11  |
| <b>Toxin (34 Items)</b>          |               |         |    |    |    |     |     |     |     |     |
| Panton-Valentine leukocidin      | 2             | -       | -  | -  | -  | +   | -   | -   | -   | -   |
| Toxic shock syndrome toxin       | 1             | -       | -  | -  | -  | -   | -   | +   | -   | -   |
| Exotoxin                         | 37            | 5       | 11 | 10 | 10 | 11  | 10  | 8   | 8   | 9   |
| Enterotoxin Yent2                | 1             | -       | -  | -  | -  | -   | -   | -   | -   | -   |
| Enterotoxin Yent1                | 1             | -       | -  | -  | -  | -   | -   | -   | -   | -   |
| Enterotoxin-like U               | 1             | +       | -  | -  | -  | +   | -   | +   | -   | -   |
| Enterotoxin-like Q               | 1             | -       | +  | -  | -  | -   | +   | -   | -   | -   |
| Enterotoxin-like P               | 1             | -       | -  | -  | -  | -   | -   | -   | -   | -   |
| Enterotoxin-like O               | 1             | +       | -  | -  | -  | +   | -   | +   | -   | -   |
